# Supplementary material for: Novel triphosphorylation polyurethane nanoparticles for blood-contacting biomaterials' coating
Source: Royal Society of Chemistry journal article supplement (doi:10.1039/c5tb01877c), 2015-12-22
Supplement: c5tb01877c1.pdf [file c5tb01877c1.pdf]

## Supporting information

For the manuscript

### **Novel Triphosphorylation Polyurethane Nanoparticles for Blood-contacting Biomaterials' Coating**

Jun Zhang<sup>a</sup>, Zhijun Sun<sup>a</sup>, aomiao Zhu<sup>a</sup>, Qiaochu Guo<sup>b</sup>, hengai He<sup>a</sup>, Ao Xia<sup>a\*</sup>, Hong  
Mo<sup>a</sup>, Xiaohua Huang<sup>a\*</sup>, Jian Shen<sup>a</sup>

- a. Jiangsu Collaborative Innovation Center of Biomedical Functional Materials,  
Jiangsu Key Laboratory of Biomedical Materials & College of Chemistry and  
Materials Science, Nanjing Normal University, Nanjing 210029, People's Republic of  
China. Fax: +86 25 83599188,
- b. Nanjing Foreign Languages School, Nanjing 210029, People's Republic of China.

\*Author to whom all correspondence should be addressed

E-mail Address: aoxia@njnu.edu.cn

huangxiaohuabio@hotmail.com

Tel: +86-25-83598031, Fax: +86-25-83716813

### Quantum chemistry calculation of $\text{NH}^+(\text{C}_2\text{H}_5)_3\text{--P}_3\text{O}_{10}^{5-}$

All the molecules were completely optimized using the DFT/B3LYP method with the 6-31+g(df,p) basis set. All the theoretical calculations were carried out using the GAUSSIAN 03 program package with the default convergence criteria.

Interaction energy is defined as  $E_b = E_{(\text{product})} - E_{(\text{reactant})}$ . In this study,  $E_{(\text{reactant})}$  is the sum energy of constituent molecules in a pair including the cationic quaternary ammonium salt  $\text{NH}^+(\text{C}_2\text{H}_5)_3$  and  $\text{PO}_4^{3-}$ /or  $\text{P}_3\text{O}_{10}^{5-}$ , each of which were previously optimized independently. Then, the pair of constituent molecules being placed together in a proper position was optimized to generate a final geometry, and the corresponding energy minima could be considered as  $E_{(\text{product})}$ .

From Table 1, the  $E_b$  of the  $\text{NH}^+(\text{C}_2\text{H}_5)_3\text{--P}_3\text{O}_{10}^{5-}$  pair is  $-0.6857720$  a.u., which is lower than that of the  $\text{NH}^+(\text{C}_2\text{H}_5)_3\text{--PO}_4^{3-}$  pair ( $-0.5710717$  a.u.). The  $\Delta E_b$  is about  $-301.58$  kJ/mol, which could explain the stronger interaction of  $\text{NH}^+(\text{C}_2\text{H}_5)_3$  and  $\text{P}_3\text{O}_{10}^{5-}$  than the pair of  $\text{NH}^+(\text{C}_2\text{H}_5)_3\text{--PO}_4^{3-}$ .

**Supplementary Table 1. The corresponding energy of each individual molecule and pair**

| Energy (a.u.) calculated at B3LYP/6-31+g(df,p) level                                                                                                                  |                |
|-----------------------------------------------------------------------------------------------------------------------------------------------------------------------|----------------|
| Individual $\text{PO}_4^{3-}$                                                                                                                                         | -642.002181748 |
| Individual $\text{P}_3\text{O}_{10}^{5-}$                                                                                                                             | -1775.89352468 |
| Individual $\text{NH}^+(\text{C}_2\text{H}_5)_3$                                                                                                                      | -292.833437537 |
| Pair of $\text{NH}^+(\text{C}_2\text{H}_5)_3\text{--PO}_4^{3-}$                                                                                                       | -935.406691004 |
| Pair of $\text{NH}^+(\text{C}_2\text{H}_5)_3\text{--P}_3\text{O}_{10}^{5-}$                                                                                           | -2069.41273429 |
| $E_b$ of $\text{NH}^+(\text{C}_2\text{H}_5)_3\text{--PO}_4^{3-}$                                                                                                      | -0.571071719   |
| $E_b$ of $\text{NH}^+(\text{C}_2\text{H}_5)_3\text{--P}_3\text{O}_{10}^{5-}$                                                                                          | -0.685772073   |
| $\Delta E_b = E_b(\text{NH}^+(\text{C}_2\text{H}_5)_3\text{--P}_3\text{O}_{10}^{5-}) - E_b(\text{NH}^+(\text{C}_2\text{H}_5)_3\text{--PO}_4^{3-}) = -301.5778$ KJ/mol |                |

A proton transfer could be observed from the optimized geometry of both pairs. As demonstrated in Figure 1, the optimized structure of the  $\text{NH}^+(\text{C}_2\text{H}_5)_3\text{--PO}_4^{3-}$  pair was characterized by the plane P25–O26–O25 (plane POO, for short) in the  $\text{HPO}_4^{2-}$  molecule, being parallel with the plane C2–C4–C6 (plane CCC, for short) of the  $\text{N}(\text{C}_2\text{H}_5)_3$  molecule, and the two negatively charged oxygen atoms pointing to the

hydrogen atoms of the  $\text{N}(\text{C}_2\text{H}_5)_3$  molecule. It turned out that the planes POO and CCC nearly coincided. However, a similar situation was not found in  $\text{NH}^+(\text{C}_2\text{H}_5)_3\text{—P}_3\text{O}_{10}^{5-}$  in which the center of the  $\text{P}_3\text{O}_{10}^{5-}$  molecule was apart from the plane CCC of the  $\text{N}(\text{C}_2\text{H}_5)_3$  in the perpendicular direction to the plane CCC (Figure 2). The analysis showed that  $\text{P}_3\text{O}_{10}^{5-}$  can receive a proton from  $\text{NH}^+(\text{C}_2\text{H}_5)_3$  and locate the minima without too much structural adjustment, whereas the  $\text{HPO}_4^{3-}$  needed to consume some of the energy to translate to a similar height of the plane CCC, and to hold a specified orientation towards the  $\text{N}(\text{C}_2\text{H}_5)_3$  upon receiving a proton.

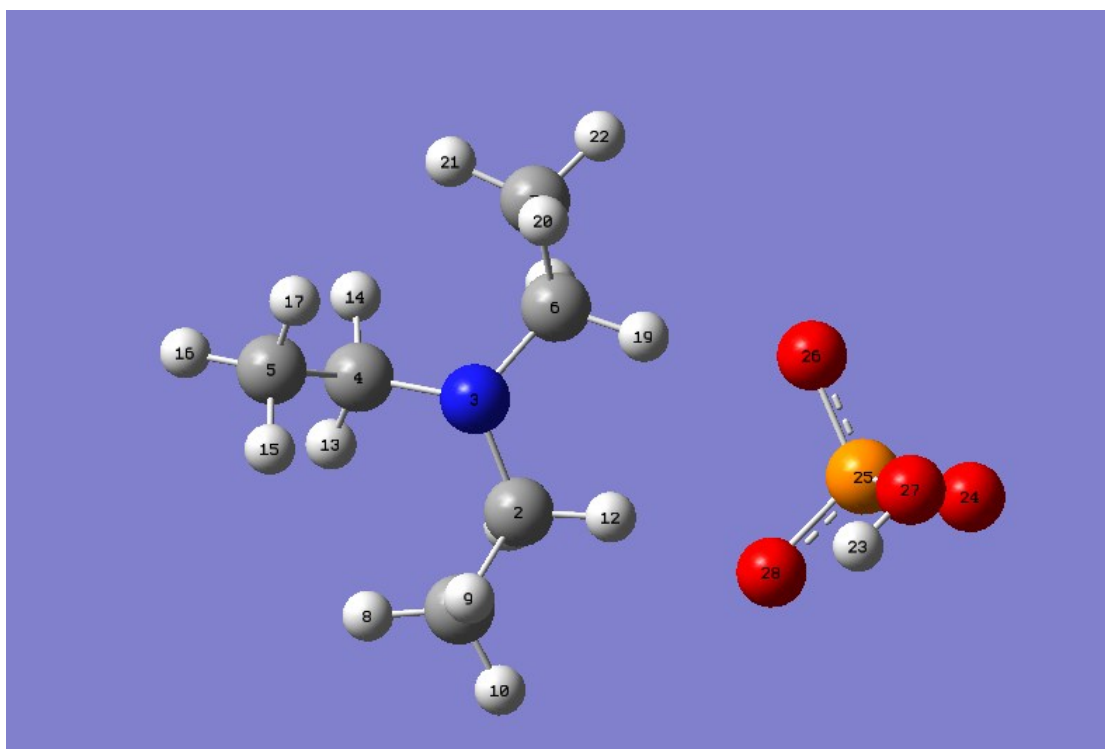

**Supplementary Figure 1. The optimized geometry of  $\text{NH}^+(\text{C}_2\text{H}_5)_3\text{—PO}_4^{3-}$  pair.**

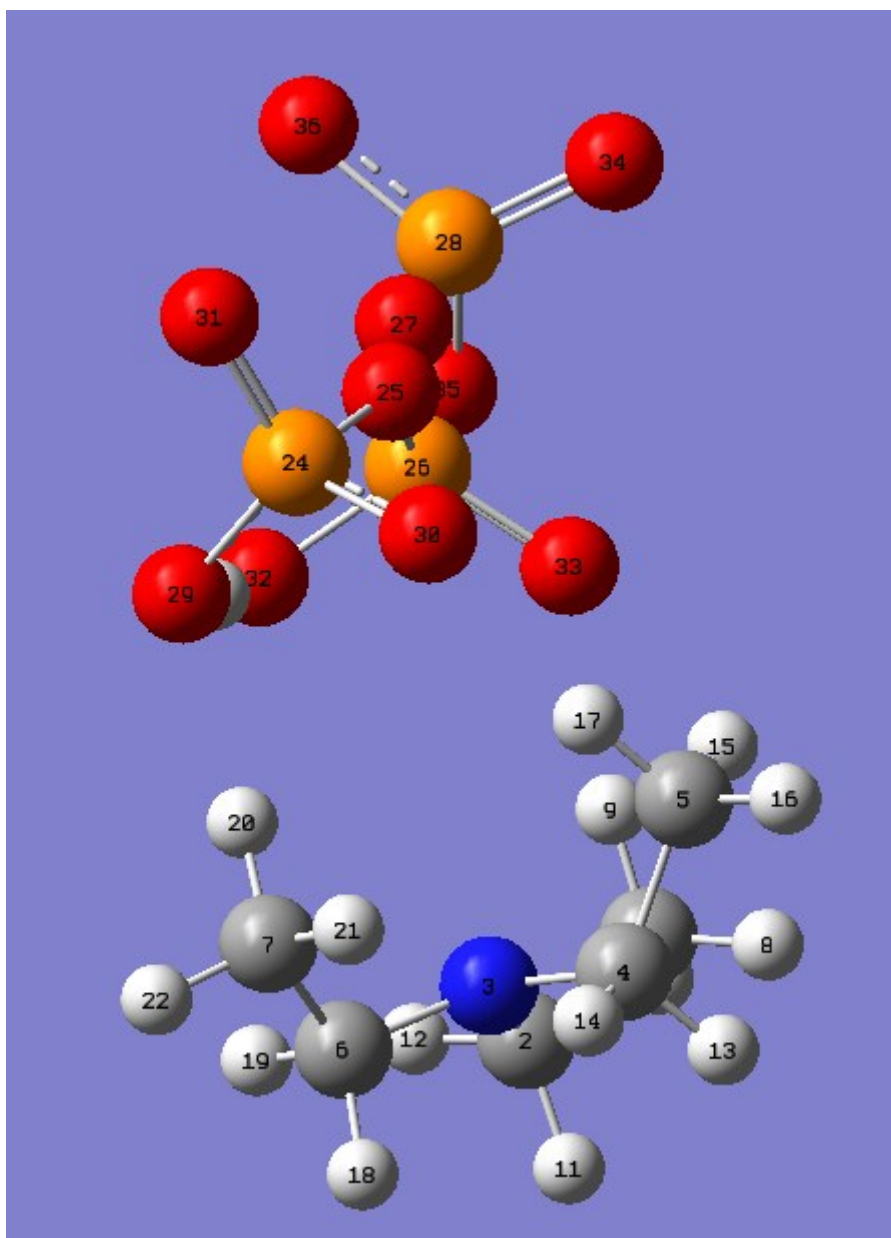

**Supplementary Figure 2. The optimized geometry of  $\text{NH}^+(\text{C}_2\text{H}_5)_3\text{—P}_3\text{O}_{10}^{5-}$  pair**

For  $\text{P}_3\text{O}_{10}^{5-}$ , the bond connecting the bridge oxygen atom and the terminal phosphorus atom is marked in Figure 3. With an equal length of 1.7182 Å for both of the marked bonds provided by an independent optimization process seemed reasonable because of molecular symmetry. However, by reacting with  $\text{NH}^+(\text{C}_2\text{H}_5)_3$ , one of the above bond lengths became longer than before, with a value of 1.8489 Å in the final optimized  $\text{N}(\text{C}_2\text{H}_5)_3\text{—HP}_3\text{O}_{10}^{5-}$  structure, and the other one remained nearly

at the original value. By receiving a proton,  $\text{P}_3\text{O}_{10}^{5-}$  might have a tendency to bonding with  $\text{NH}^+(\text{C}_2\text{H}_5)_3$  center.

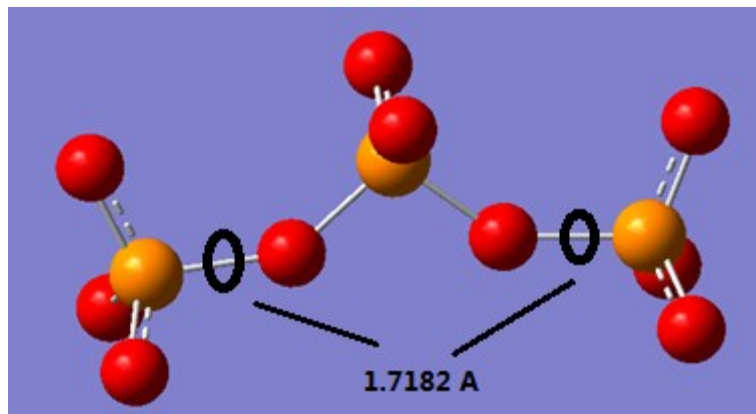

**Supplementary Figure 3. The optimized of  $\text{P}_3\text{O}_{10}^{5-}$  molecule individually.**
